# Supplementary material
Source: PubMed Central journal article supplement (PMC3883984)
Supplement: NIHMS494338-supplement-784_2013_1009_MOESM1_ESM.pdf [file NIHMS494338-supplement-784_2013_1009_MOESM1_ESM.pdf]

# Supplementary

## Table of Contents

[List of species/strains 16S rRNA gene collected and aligned for design of specific primer and probe sets](#)

[Lactobacilli 16S rRNA gene list](#)

[Streptococci 16S rRNA gene list](#)

[\*Fusobacterium\* spp. 16S rRNA gene list](#)

[\*Prevotella\* spp. 16S rRNA gene list](#)

[Mixed bacteria 16S rRNA gene list](#)

[DNA library preparation for PCR specificity test](#)

[PCR specificity test](#)

**Table S1. List of species/strains of complete 16S rRNA gene collected and aligned for design of specific primer and probe sets.**

| <b>Bacteria species/strain</b>                                    | <b>GenBank accession number</b> |
|-------------------------------------------------------------------|---------------------------------|
| <b>Lactobacilli</b> ( <a href="#">Back to table of contents</a> ) |                                 |
| 1. Lactobacillus delbrueckii strain UFV H2b20                     | EF015468.1                      |
| 2. Lactobacillus brevis strain I218                               | EF412983.1                      |
| 3. Lactobacillus brevis strain I25                                | EF412981.1                      |
| 4. Lactobacillus brevis strain I12                                | EF412979.1                      |
| 5. Lactobacillus brevis strain I211                               | EF412982.1                      |
| 6. Lactobacillus brevis strain I23                                | EF412980.1                      |
| 7. Lactobacillus salivarius strain ATCC 11741                     | AF089108.2                      |
| 8. Lactobacillus sp. JKD6                                         | AF264701.2                      |
| 9. Lactobacillus manihotivorans strain OND 32                     | AF000162.1                      |
| 10. Lactobacillus mucosae                                         | AF126738.1                      |
| 11. Lactobacillus manihotivorans strain YAM I                     | AF000163.1                      |
| 12. Lactobacillus oeni strain 59b                                 | AY681127.2                      |
| 13. Lactobacillus uvarum strain 8                                 | AY681126.2                      |
| 14. Lactobacillus sp. 34-10B                                      | AY960573.1                      |
| 15. Lactobacillus sp. 459                                         | AY681135.1                      |
| 16. Lactobacillus sp. 166                                         | AY681133.1                      |
| 17. Lactobacillus vini strain 116                                 | AY681131.1                      |
| 18. Lactobacillus sp. 71                                          | AY681129.1                      |
| 19. Lactobacillus bobalius strain 203                             | AY681134.1                      |
| 20. Lactobacillus vini strain 154                                 | AY681132.1                      |
| 21. Lactobacillus sp. 88                                          | AY681130.1                      |
| 22. Lactobacillus uvarum strain 68                                | AY681128.1                      |
| 23. Lactobacillus brevis strain RO97                              | AF515219.1                      |
| 24. Lactobacillus plantarum strain RO7                            | AF515222.1                      |

|                                                                                 |             |
|---------------------------------------------------------------------------------|-------------|
| 25. <i>Lactobacillus brevis</i> strain RO66                                     | AF515220.1  |
| 26. <i>Lactobacillus suntoryeus</i> strain IDCC 3101                            | EF533989.1  |
| 27. <i>Lactobacillus suntoryeus</i> strain LH4                                  | AY675250.1  |
| 28. <i>Lactobacillus suntoryeus</i> strain LH5                                  | AY675251.1  |
| 29. <i>Lactobacillus</i> sp. KR3                                                | AF333975.1  |
| 30. <i>Lactobacillus salivarius</i> subsp. <i>salivarius</i>                    | AF335475.1  |
| 31. <i>Lactobacillus gasseri</i> strain ATCC 33323                              | AF519171.1  |
| 32. <i>Lactobacillus thailandensis</i>                                          | AB257863.1  |
| 33. <i>Lactobacillus camelliae</i>                                              | AB257864.1  |
| 34. <i>Lactobacillus plantarum</i>                                              | AB326301.1  |
| 35. <i>Lactobacillus fabifermentans</i>                                         | AM905388.1  |
| 36. <i>Lactobacillus cacaonum</i>                                               | AM905389.1  |
| 37. <i>Lactobacillus pantheris</i> strain LMG 21017                             | NR_025189.1 |
| 38. <i>Lactobacillus mucosae</i> strain CCUG 43179                              | NR_024994.1 |
| 39. <i>Lactobacillus manihotivorans</i> strain OND 32                           | NR_024835.1 |
| 40. <i>Lactobacillus nantensis</i> strain LP33                                  | AY690834.1  |
| 41. <i>Lactobacillus salivarius</i> strain KLB39                                | AY112743.2  |
| 42. <i>Lactobacillus</i> sp. NGRI 0130                                          | AB362984.1  |
| 43. <i>Lactobacillus</i> sp. NGRI 0001                                          | AB362983.1  |
| 44. <i>Lactobacillus plantarum</i>                                              | AB362982.1  |
| 45. <i>Lactobacillus rhamnosus</i> strain IDCC 3201                             | EF533991.1  |
| 46. <i>Lactobacillus acidophilus</i> strain IDCC 3301                           | EF533992.1  |
| 47. <i>Lactobacillus gasseri</i> strain IDCC 3102                               | EF533990.1  |
| 48. <i>Lactobacillus rhamnosus</i> isolate 5D                                   | AY773957.1  |
| 49. <i>Lactobacillus paracasei</i> isolate 9C                                   | AY773955.1  |
| 50. <i>Lactobacillus paracasei</i> isolate 3C                                   | AY773953.1  |
| 51. <i>Lactobacillus paracasei</i> subsp. <i>paracasei</i> strain BCRC12193     | AY773951.1  |
| 52. <i>Lactobacillus delbrueckii</i> subsp. <i>delbrueckii</i> strain BCRC12195 | AY773949.1  |
| 53. <i>Lactobacillus acidophilus</i> strain BCRC10695                           | AY773947.1  |
| 54. <i>Lactobacillus casei</i> strain BCRC10697                                 | AY773945.1  |
| 55. <i>Lactobacillus rhamnosus</i> isolate 11D                                  | AY773958.1  |
| 56. <i>Lactobacillus paracasei</i> isolate 10C                                  | AY773956.1  |
| 57. <i>Lactobacillus paracasei</i> isolate 4C                                   | AY773954.1  |
| 58. <i>Lactobacillus paracasei</i> isolate 2C                                   | AY773952.1  |
| 59. <i>Lactobacillus delbrueckii</i> subsp. <i>lactis</i> strain BCRC11051      | AY773950.1  |
| 60. <i>Lactobacillus delbrueckii</i> subsp. <i>bulgaricus</i> strain BCRC10696  | AY773948.1  |

|                                                                   |            |
|-------------------------------------------------------------------|------------|
| 61. Lactobacillus sp. BCRC16000                                   | AY773946.1 |
| 62. Lactobacillus fermentum strain PL9005                         | AF477498.1 |
| 63. Lactobacillus paracasei                                       | AY735405.2 |
| 64. Lactobacillus rhamnosus strain P15                            | AY852248.1 |
| 65. Lactobacillus ultunensis                                      | AY253660.1 |
| 66. Lactobacillus gastricus                                       | AY253658.1 |
| 67. Lactobacillus antri                                           | AY253659.1 |
| 68. Lactobacillus kalixensis                                      | AY253657.1 |
| 69. Lactobacillus plantarum strain LP2                            | AY735409.1 |
| 70. Lactobacillus delbrueckii subsp. bulgaricus strain LG1        | AY735407.1 |
| 71. Lactobacillus plantarum strain LP1                            | AY735404.1 |
| 72. Lactobacillus reuteri strain LU3                              | AY735406.1 |
| 73. Lactobacillus paracollinoides                                 | AB159218.1 |
| 74. Lactobacillus plantarum strain LP3                            | AY675256.1 |
| 75. Lactobacillus rhamnosus strain LR2                            | AY675254.1 |
| 76. Lactobacillus casei strain LC3                                | AY675252.1 |
| 77. Lactobacillus delbrueckii subsp. bulgaricus strain LGM2       | AY675257.1 |
| 78. Lactobacillus paracasei strain LPC1                           | AY675255.1 |
| 79. Lactobacillus rhamnosus strain LR3                            | AY675253.1 |
| 80. Lactobacillus paracasei subsp. paracasei strain LPC3          | AY692452.1 |
| 81. Lactobacillus sp. MD-1                                        | AY496039.1 |
| 82. Lactobacillus sp. rennanqilyf5                                | AY339128.2 |
| 83. Lactobacillus sp. GV6                                         | AY330709.1 |
| 84. Lactobacillus sp. G12                                         | AF308146.1 |
| 85. Lactobacillus pantheri                                        | AF413523.1 |
| 86. Lactobacillus fermentum strain KLB12                          | AF522394.1 |
| 87. Lactobacillus fermentum                                       | AF302116.1 |
| 88. Lactobacillus fermentum                                       | U62624.1   |
| 89. L.acidophilus                                                 | 1X61138.1  |
| 90. Lactobacillus acidophilus                                     | M58802.1   |
| 91. Lactobacillus acidophilus johnsonii                           | M99704.1   |
| <b>Streptococci</b> ( <a href="#">Back to table of contents</a> ) |            |
| 1. Streptococcus vestibularis strain ATCC 49124                   | AY188353.1 |

|                                              |            |
|----------------------------------------------|------------|
| 2. Streptococcus cristatus strain ATCC 51100 | AY188347.1 |
| 3. Streptococcus downei strain ATCC 33748    | AY188350.1 |
| 4. Streptococcus macacae strain ATCC 35911   | AY188351.1 |
| 5. Streptococcus sp. oral clone ASCE04       | AY953253.1 |
| 6. Streptococcus sp. oral clone ASCF07       | AY953255.1 |
| 7. Streptococcus gallolyticus                | AF323911.1 |
| 8. Streptococcus suis                        | AF009509.1 |
| 9. Streptococcus suis                        | AF009507.1 |
| 10. Streptococcus suis                       | AF009505.1 |
| 11. Streptococcus waiu                       | AF088900.1 |
| 12. Streptococcus suis                       | AF009508.1 |
| 13. Streptococcus suis                       | AF009506.1 |
| 14. Streptococcus suis                       | AF009504.1 |
| 15. Streptococcus sp. oral clone ASCD10      | DQ272509.1 |
| 16. Streptococcus sp. oral clone ASCC12      | DQ272507.1 |
| 17. Streptococcus sp. oral clone ASCE05      | DQ272510.1 |
| 18. Streptococcus sp. oral clone ASCC01      | DQ272506.1 |
| 19. Streptococcus sp. oral clone ASCA03      | DQ272504.1 |
| 20. Streptococcus sp. oral clone ASCG04      | AY923145.1 |
| 21. Streptococcus sp. oral clone ASCE10      | AY923137.1 |
| 22. Streptococcus sp. oral clone ASCE06      | AY923135.1 |
| 23. Streptococcus sp. oral clone ASCD01      | AY923129.1 |
| 24. Streptococcus sp. oral clone ASCC04      | AY923127.1 |
| 25. Streptococcus sp. oral clone ASCB12      | AY923125.1 |
| 26. Streptococcus sp. oral clone ASCB04      | AY923123.1 |
| 27. Streptococcus sp. oral clone ASB02       | AY923121.1 |
| 28. Streptococcus sp. oral clone ASCA09      | AY923119.1 |
| 29. Streptococcus sp. oral clone ASCF09      | AY923142.1 |
| 30. Streptococcus sp. oral clone ASCF05      | AY923140.1 |
| 31. Streptococcus sp. oral clone ASCE12      | AY923138.1 |
| 32. Streptococcus sp. oral clone ASCE09      | AY923136.1 |
| 33. Streptococcus sp. oral clone ASCE03      | AY923134.1 |
| 34. Streptococcus sp. oral clone ASCE01      | AY923132.1 |
| 35. Streptococcus sp. oral clone ASCD09      | AY923130.1 |
| 36. Streptococcus sp. oral clone ASCC05      | AY923128.1 |
| 37. Streptococcus sp. oral clone ASCB06      | AY923124.1 |

|                                                  |            |
|--------------------------------------------------|------------|
| 38. Streptococcus sp. oral clone ASCA04          | AY923116.1 |
| 39. Streptococcus mutans strain UA140            | AF077836.1 |
| 40. Streptococcus mutans strain 669              | AF077834.1 |
| 41. Streptococcus mutans strain LM7              | AF077832.1 |
| 42. Streptococcus mutans strain UA96             | AF077835.1 |
| 43. Streptococcus mutans strain AF199            | AF077833.1 |
| 44. Streptococcus oralis                         | AF003932.1 |
| 45. Streptococcus thermophilus                   | DQ176426.1 |
| 46. Streptococcus thermophilus strain ST3        | AY675258.1 |
| 47. Streptococcus dysgalactiae                   | AB102730.1 |
| 48. Streptococcus equinus NCDO1037T              | AF429765.1 |
| 49. Streptococcus suis strain SAP 77             | AF284578.2 |
| 50. Streptococcus parauberis strain SAP 99       | AF284579.2 |
| 51. Streptococcus thermophilus strain ATCC 19258 | AY188354.1 |
| 52. Streptococcus sobrinus strain ATCC 33478     | AY188349.1 |
| 53. Streptococcus salivarius strain ATCC 7073    | AY188352.1 |
| 54. Streptococcus mutans strain ATCC 25175       | AY188348.1 |
| 55. Streptococcus sp. TW1                        | AF084836.1 |
| 56. Streptococcus sp. KN3                        | AF084834.1 |
| 57. Streptococcus sp. KN1                        | AF084832.1 |
| 58. Streptococcus sp. KN2                        | AF084833.1 |
| 59. Streptococcus parasanguis                    | AF003933.1 |
| 60. Streptococcus pneumoniae                     | AF003930.1 |
| 61. Streptococcus sanguis                        | AF003928.1 |
| 62. Streptococcus gordonii                       | AF003931.1 |
| 63. Streptococcus mitis                          | AF003929.1 |
| 64. Streptococcus uberis                         | AB002527.1 |
| 65. Streptococcus suis                           | AB002525.1 |
| 66. Streptococcus porcinus                       | AB002523.1 |
| 67. Streptococcus pyogenes                       | AB002521.1 |
| 68. Streptococcus equi                           | AB002516.1 |
| 69. Streptococcus equinus                        | AB002514.1 |
| 70. Streptococcus dysgalactiae                   | AB002492.1 |
| 71. Streptococcus uberis                         | AB002526.1 |
| 72. Streptococcus sanguis                        | AB002524.1 |
| 73. Streptococcus pneumoniae                     | AB002522.1 |

|                                                                              |            |
|------------------------------------------------------------------------------|------------|
| 74. Streptococcus mitis                                                      | AB002520.1 |
| 75. Streptococcus hyointestinalis                                            | AB002518.1 |
| 76. Streptococcus dysgalactiae                                               | AB002511.1 |
| 77. Streptococcus dysgalactiae                                               | AB002497.1 |
| 78. Streptococcus dysgalactiae                                               | AB002495.1 |
| 79. Streptococcus canis                                                      | AB002483.1 |
| <b><i>Fusobacterium</i> spp. (<a href="#">Back to table of contents</a>)</b> |            |
| 1. Fusobacterium sp. oral clone ASCF11                                       | AY953256.1 |
| 2. Fusobacterium sp. oral clone ASCF06                                       | AY923141.1 |
| 3. Fusobacterium sp. RMA 2453                                                | AJ867041.1 |
| 4. Fusobacteriumnecrophorum                                                  | AJ867039.1 |
| 5. Fusobacteriumulcerans                                                     | AJ867037.1 |
| 6. Fusobacteriumvarium                                                       | AJ867035.1 |
| 7. Fusobacteriummortiferum                                                   | AJ867033.1 |
| 8. Fusobacterium sp. RMA 1065                                                | AJ867040.1 |
| 9. Fusobacteriumnecrophorum                                                  | AJ867038.1 |
| 10. Fusobacteriumvarium                                                      | AJ867036.1 |
| 11. Fusobacteriumnecrogenes                                                  | AJ867034.1 |
| 12. Fusobacteriummortiferum                                                  | AJ867032.1 |
| 13. Fusobacteriumnucleatum subsp. nucleatum                                  | AJ133496.1 |
| 14. Fusobacteriumnecrophorum                                                 | AF044948.1 |
| 15. F.necrophorum (FnS-40) gene for                                          | X74408.1   |
| 16. F.necrophorum (FnS-1)                                                    | X74407.1   |
| <b><i>Prevotella</i> spp. (<a href="#">Back to table of contents</a>)</b>    |            |
| 1. Prevotella sp. oral clone ASCD07                                          | AY953252.1 |
| 2. Prevotella sp. oral clone ASCG12                                          | DQ272511.1 |
| 3. Prevotella sp. oral clone ASCG10                                          | AY923148.1 |
| 4. Prevotellazoogoleoformans ATCC 33285                                      | L16488.1   |
| 5. Prevotellaheparinolytica ATCC                                             | L16487.1   |
| 6. Prevotellatanneriae strain 93-1-2                                         | AF183406.1 |

|                                                                     |            |
|---------------------------------------------------------------------|------------|
| 7. Prevotellatannerae strain 83-10-2                                | AF183404.1 |
| 8. Prevotellatannerae strain 131-9-1                                | AF183402.1 |
| 9. Prevotellatannerae strain 89-9-1                                 | AF183405.1 |
| 10. Prevotellatannerae strain 29-1                                  | AF183403.1 |
| 11. Prevotelladisiens ATCC 29426                                    | L16483.1   |
| 12. Prevotellaloescheii ATCC 15930                                  | L16481.1   |
| 13. Prevotellanigrescens ATCC 25261                                 | L16479.1   |
| 14. Prevotellabuccae ATCC 33574                                     | L16477.1   |
| 15. Prevotellabivia ATCC 29303                                      | L16475.1   |
| 16. Prevotellaveroralis ATCC 33779                                  | L16473.1   |
| 17. Prevotellamelaninogenica ATCC 43982                             | L16470.1   |
| 18. Prevotellaintermedia ATCC 25611                                 | L16468.1   |
| 19. Prevotelladenticola ATCC 33185                                  | L16466.1   |
| 20. Prevotellaruminicola ATCC 19189                                 | L16482.1   |
| 21. Prevotellaoralis ATCC 33269)                                    | L16480.1   |
| 22. Prevotellabuccae ATCC 33690                                     | L16478.1   |
| 23. Prevotellabuccalis ATCC 35310                                   | L16476.1   |
| 24. Prevotellaoris ATCC 33573                                       | L16474.1   |
| 25. Prevotellanigrescens ATCC 33563                                 | L16471.1   |
| 26. Prevotellamelaninogenica ATCC 25845                             | L16469.1   |
| 27. Prevotelladenticola ATCC 35308                                  | L16467.1   |
| 28. Prevotellacorporis ATCC 33547                                   | L16465.1   |
| 29. Prevotellaalbensis                                              | AJ011683.1 |
| 30. Prevotellabryantii                                              | AJ006457.1 |
| 31. Prevotellabrevis                                                | AJ011682.1 |
| 32. Prevotellaenoeca                                                | AJ005635.1 |
| 33. Prevotellapallens                                               | Y13106.1   |
| 34. Prevotellapallens                                               | Y13105.1   |
| 35. Prevotellapallens                                               | Y13107.1   |
| 36. P.dentalis                                                      | X81876.1   |
| 37. P.nigrescens                                                    | X73963.1   |
| <b>Mixed bacteria</b> ( <a href="#">Back to table of contents</a> ) |            |
| 1. Pseudomonas aeruginosa strain                                    | EU834943.1 |
| 2. Aggregatibacteraphophilus strain ATCC 7901                       | M75040.1   |



|                                                |            |
|------------------------------------------------|------------|
| 3. Clostridium sp. strain P6                   | AY949857.1 |
| 4. Escherichia coli strain T10                 | AY804014.1 |
| 5. Mycobacterium parmensis                     | AF466821.2 |
| 6. Mycobacterium sp. FI-25796                  | AF058299.1 |
| 7. Clostridium frigidicarnis                   | AF069742.1 |
| 8. Mycobacterium goodii strain MSFC 2-M3-R-2   | DQ447773.1 |
| 9. Mycobacterium septicum strain MSFC 2-M3-R-4 | DQ447772.1 |
| 10. Pseudomonas aeruginosa strain B13          | DQ350823.1 |
| 11. Pseudomonas aeruginosa strain B2           | DQ350824.1 |
| 12. Haemophilus sp. oral clone ASCB01          | DQ272505.1 |
| 13. Haemophilus sp. oral clone ASCG06          | AY923147.1 |
| 14. Haemophilus sp. oral clone ASCA10          | AY923120.1 |
| 15. Clostridium sp. ID4                        | AY960571.1 |
| 16. Clostridium sp. ID11                       | AY960565.1 |
| 17. Clostridium sp. CE6                        | AY960563.1 |
| 18. Clostridium sp. ID5                        | AY960574.1 |
| 19. Clostridium sp. ID6                        | AY960572.1 |
| 20. Clostridium sp. ID3                        | AY960570.1 |
| 21. Clostridium sp. IE5                        | AY960566.1 |
| 22. Neisseria meningitidis strain N.261/03     | AY735389.1 |
| 23. Neisseria meningitidis strain N.138/00     | AY735369.1 |
| 24. Neisseria meningitidis strain N.544/03     | AY735392.1 |
| 25. Neisseria meningitidis strain N.479/03     | AY735390.1 |
| 26. Neisseria meningitidis strain N.677/03     | AY735388.1 |
| 27. Neisseria meningitidis strain N.817/03     | AY735382.1 |
| 28. Neisseria meningitidis strain N.573/02     | AY735378.1 |
| 29. Neisseria meningitidis strain N.3/94       | AY735342.1 |
| 30. Clostridium sp. cTPY-17                    | AY239462.1 |
| 31. Mycobacterium vulneris strain NLA000700772 | EU834055.1 |
| 32. Clostridium scindens                       | AY878326.1 |
| 33. Clostridium sulfidigenes strain SGB2       | EF199998.1 |
| 34. Mycoplasma orale strain NC10112            | AY796060.1 |
| 35. Corynebacterium pseudogenitalium           | U87822.1   |
| 36. Peptostreptococcus anaerobius              | L04168.1   |
| 37. Corynebacterium genitalium                 | U87817.1   |
| 38. Bacteroides forsythus                      | L16495.1   |

|                                                                        |             |
|------------------------------------------------------------------------|-------------|
| 39. <i>Bifidobacteriumcatenulatum</i>                                  | M58732.1    |
| 40. <i>Neisseria elongata</i> subsp. <i>elongata</i> strain ATCC 25295 | NR_025893.1 |
| 41. <i>Pseudomonas aeruginosa</i> strain Z5                            | AY548952.1  |
| 42. <i>Pseudomonas aeruginosa</i> strain Z11                           | AY548953.1  |
| 43. <i>Clostridium papyrosolvens</i> DSM 2782                          | NR_026102.1 |
| 44. <i>Mycobacterium parmense</i> strain MUP 1182                      | NR_025225.1 |
| 45. <i>Neisseria gonorrhoeae</i> strain NCTC 83785                     | NR_026079.1 |
| 46. <i>Actinomycesdentalis</i> strain R18165                           | NR_025633.1 |
| 47. <i>Clostridium neopropionicum</i> strain DSM 3847                  | NR_026150.1 |
| 48. <i>Mycobacterium szulgai</i> strain ATCC 35799                     | NR_026080.1 |
| 49. <i>Pseudomonas aeruginosa</i> strain DSM 50071                     | NR_026078.1 |
| 50. <i>Clostridium chauvoei</i> strain 2585                            | NR_026013.1 |
| 51. <i>Mycobacterium nebraskense</i> strain UNMC-MY1349                | NR_025767.1 |
| 52. <i>Mycobacterium lepromatosis</i> strain FJ924                     | EU203590.2  |
| 53. <i>Clostridium butyricum</i> strain IDCC 5101                      | EF533982.1  |
| 54. <i>Mycoplasma cricetuli</i> strain CH                              | EF036469.1  |
| 55. <i>Pseudomonas aeruginosa</i> gene for                             | AB126582.1  |
| 56. <i>Bacteroidesuniformis</i>                                        | AB247145.1  |
| 57. <i>Bacteroidesuniformis</i>                                        | AB247146.1  |
| 58. <i>Clostridium scatologenes</i> strain ATCC 25775                  | M59104.2    |
| 59. <i>Corynebacteriumglutamicum</i> strain CICC10120                  | DQ171713.1  |
| 60. <i>Corynebacteriumglutamicum</i> strain CICC10046                  | DQ171714.1  |
| 61. <i>Mycoplasma coccoides</i>                                        | AY171918.1  |
| 62. <i>Clostridium intestinale</i>                                     | AY781385.1  |
| 63. <i>Mycoplasma bovis</i> strain 2875                                | AY526883.1  |
| 64. <i>Mycoplasma agalactiae</i> strain KS6                            | AY526879.1  |
| 65. <i>Mycoplasma bovis</i> strain 613                                 | AY526882.1  |
| 66. <i>Mycoplasma agalactiae</i> strain 6804                           | AY526880.1  |
| 67. <i>Mycoplasma</i> sp. 8790CV                                       | AY526874.1  |
| 68. <i>Clostridium</i> sp. strain Z6                                   | AY949859.1  |
| 69. <i>Bacteroides</i> sp. strain Z4                                   | AY949860.1  |
| 70. <i>Escherichia coli</i>                                            | AY776275.1  |
| 71. <i>Mycobacterium nebraskense</i> strain UNMC-MY1349                | AY368456.1  |
| 72. <i>Bifidobacteriumbreve</i> strain BR2                             | AY735402.1  |
| 73. <i>Bifidobacteriumlongum</i> strain BG3                            | AY735403.1  |
| 74. <i>Clostridium hathewayi</i>                                       | AY552788.2  |

|                                                           |            |
|-----------------------------------------------------------|------------|
| 75. <i>Bifidobacterium longum</i> strain BG               | AY675246.1 |
| 76. <i>Bifidobacterium bifidum</i>                        | AY694148.1 |
| 77. <i>Pseudomonas aeruginosa</i>                         | AY596792.1 |
| 78. <i>Pseudomonas aeruginosa</i>                         | AB091760.1 |
| 79. <i>Clostridium tetani</i>                             | X74770.1   |
| 80. <i>Bifidobacterium thermacidophilum</i> subsp. suis   | AY148470.1 |
| 81. <i>Mycobacterium</i> sp. LC6                          | AY351648.1 |
| 82. <i>Pseudomonas aeruginosa</i>                         | AB108690.1 |
| 83. <i>Mycobacterium vaccae</i> isolate VM0587            | AF544638.1 |
| 84. <i>Mycobacterium frederiksbergense</i> isolate VM0503 | AF544628.1 |
| 85. <i>Mycobacterium austroafricanum</i> isolate VM0450   | AF544623.1 |
| 86. <i>Mycobacterium vaccae</i> isolate VM0588            | AF544639.1 |
| 87. <i>Mycobacterium gilvum</i> isolate VM0583            | AF544637.1 |
| 88. <i>Mycobacterium frederiksbergense</i> isolate VM0585 | AF544632.1 |
| 89. <i>Mycobacterium austroafricanum</i> isolate VM0573   | AF544627.1 |
| 90. <i>Mycobacterium austroafricanum</i> isolate VM0456   | AF544622.1 |
| 91. <i>Bifidobacterium thermophilum</i>                   | AB016246.1 |
| 92. <i>Mycobacterium</i> sp. PYR-I                        | U30662.1   |
| 93. <i>Bacteroides ovatus</i> NCTC 11153                  | L16484.1   |
| 94. <i>Mycobacterium</i> sp. RJGll.135                    | U30661.1   |
| 95. <i>Bacteroides plachnicus</i> NCTC 10825              | L16496.1   |
| 96. <i>Bacteroides eggerthii</i> NCTC 11185               | L16485.1   |
| 97. <i>Mycoplasma meleagridis</i>                         | L24106.1   |
| 98. <i>Clostridium stercorarium</i> subsp. thermolacticum | L09176.1   |
| 99. <i>Mycobacterium interjectum</i>                      | AF014937.1 |
| 100. <i>Peptostreptococcus</i> sp.                        | L04166.1   |
| 101. <i>Clostridium aminophilum</i>                       | L04165.1   |
| 102. <i>Clostridium sticklandii</i>                       | L04167.1   |
| 103. <i>Pseudomonas aeruginosa</i>                        | AF237678.1 |
| 104. Actinomycete SF2809                                  | AB017374.1 |
| 105. <i>Clostridium indolis</i>                           | AF028351.1 |
| 106. <i>Clostridium fusiformis</i>                        | AF028349.1 |
| 107. <i>Clostridium cocleatum</i>                         | AF028350.1 |
| 108. <i>Mycoplasma bovis</i>                              | U02968.1   |
| 109. <i>Mycobacterium</i> sp. T104                        | U62890.1   |
| 110. <i>Haemophilus influenzae</i> -murium                | AF024530.1 |

|                                         |            |
|-----------------------------------------|------------|
| 111. <i>Corynebacterium xerosis</i>     | AF024653.1 |
| 112. <i>Mycobacterium alvei</i>         | AF023664.1 |
| 113. <i>Mycobacterium novocastrense</i> | U96747.1   |
| 114. <i>Mycobacterium</i> sp. RF002     | U90876.1   |
| 115. <i>Corynebacterium jeikeium</i>    | U87823.1   |
| 116. <i>Corynebacterium genitalium</i>  | U87821.1   |
| 117. <i>Corynebacterium genitalium</i>  | U87819.1   |
| 118. <i>Corynebacterium jeikeium</i>    | U87816.1   |
| 119. <i>Corynebacterium genitalium</i>  | U87824.1   |
| 120. <i>Corynebacterium genitalium</i>  | U87820.1   |
| 121. <i>Mycoplasma leopharyngis</i>     | U16760.1   |
| 122. <i>Mycoplasma feliminutum</i>      | U16758.1   |

### DNA library preparation for PCR specificity test ([Back to table of contents](#))

*Lactobacillus rhamnosus* ATCC 7469, *Lactobacillus salivarius* ATCC 11741, *Lactobacillus casei* ATCC 393 and *Lactobacillus plantarum* ATCC 14917 were grown on MRS agar/broth (Oxoid) and *Streptococcus mutans* NCTC 10449, *Streptococcus oralis* NCTC 11427, *Streptococcus mitis* NCTC 12261 and *Streptococcus parasanguis* NCTC 15912 were grown on Columbia agar (Oxoid) or in Brain-Heart infusion broth (Oxoid). Cultures were grown at 37°C under microaerobic condition in a candle jar or in MRS broth (Oxoid) in an anaerobic chamber with 90% N<sub>2</sub>, 5% H<sub>2</sub> and 5% CO<sub>2</sub> atmosphere. DNA was subsequently extracted using a QIAamp DNA Mini Kit (Qiagen Inc., Australia) as per the manufacturer's instructions.

Similarly, isolated DNA from *Parvimonas micra* (formerly *Peptostreptococcus micros*) ATCC 33270, *Fusobacterium nucleatum* ATCC 25586, *Escherichia coli* (ECAT1177T), *Pseudomonas aeruginosa* ATCC 19660, *Prevotella denticola* (AF139203), *Prevotella melaninogenica* ATCC 25845 and *Prevotella tanneriae* were provided by Dr Mangala Nadkarni, Institute of Dental Research. *Streptococcus gordonii* ATCC 10558 was provided by Dr Derek Harty, Institute of Dental Research. *Prevotella intermedia* ATCC 25611, *Porphyromonas gingivalis* W83 and *Tannerella forsythia* ATCC 43037 were contributed by Dr Ky-Anh Nguyen, Institute of Dental Research.

*Lactobacillus gasseri* (clinical isolate), *Streptococcus thermophilus*, *Streptococcus vestibularis* (clinical isolate), *Fusobacterium necrophorum* (clinical isolate), *Bifidobacterium breve* (clinical isolate), *Actinomyces israelii* ATCC 10048, *Actinomyces israelii* (clinical isolate), *Neisseria meningitidis* ATCC 13102, *Neisseria gonorrhoea* ATCC 43069, *Neisseria elongate* (clinical isolate),

*Haemophilus influenza* ATCC 49247, *Haemophilus parainfluenza* ATCC 33392, *Prevotella bivia* (clinical isolate), *Bacteroides uniformis* (Clinical isolate), *Bacteroides eggerthii* (clinical isolate) were grown at the Institute of Clinical Pathology and Medical Research (Westmead, Australia) and DNA extraction were performed using an automated nucleic acid extraction instrument NucliSENS® easyMag® (bioMerieux Inc., Durham, North Carolina) as per the manufacturer's protocol. 16S rRNA genes were amplified by PCR using the DNA template extracted from clinical isolates using a universal primer set and sent for sequencing at Australian Genome Research Facility (Westmead Millennium Institute, Westmead, Australia) for identification. The resulting 16S rRNA gene sequence was checked by BLAST before it was used for PCR specificity testing.

### **PCR specificity test** ([Back to table of contents](#))

Extracted reference bacterial DNA was used in polymerase chain reactions to test the generaspecificity of designed primer sets. In a 25 µl volume reaction containing 12.5 µl HotStar Taq polymerase Master mix (Qiagen), 0.4 µM forward and reverse primers and 1 µl DNA template, PCR cycling parameters were as follows: 95°C for 15 min, followed by 30 cycles of 94°C for 30 s denaturation and 58°C for 60 s elongation for streptococcal, prevotellae and fusobacteria primer sets. For the lactobacilli primer set, 62°C for 60 s elongation was used. PCR products were run on 2% agarose gel in Tris-EDTA-acetate (TAE) buffer containing ethidium bromide for visualization of electrophoresed DNA under ultraviolet light (**Fig. S1-S4**).

S1

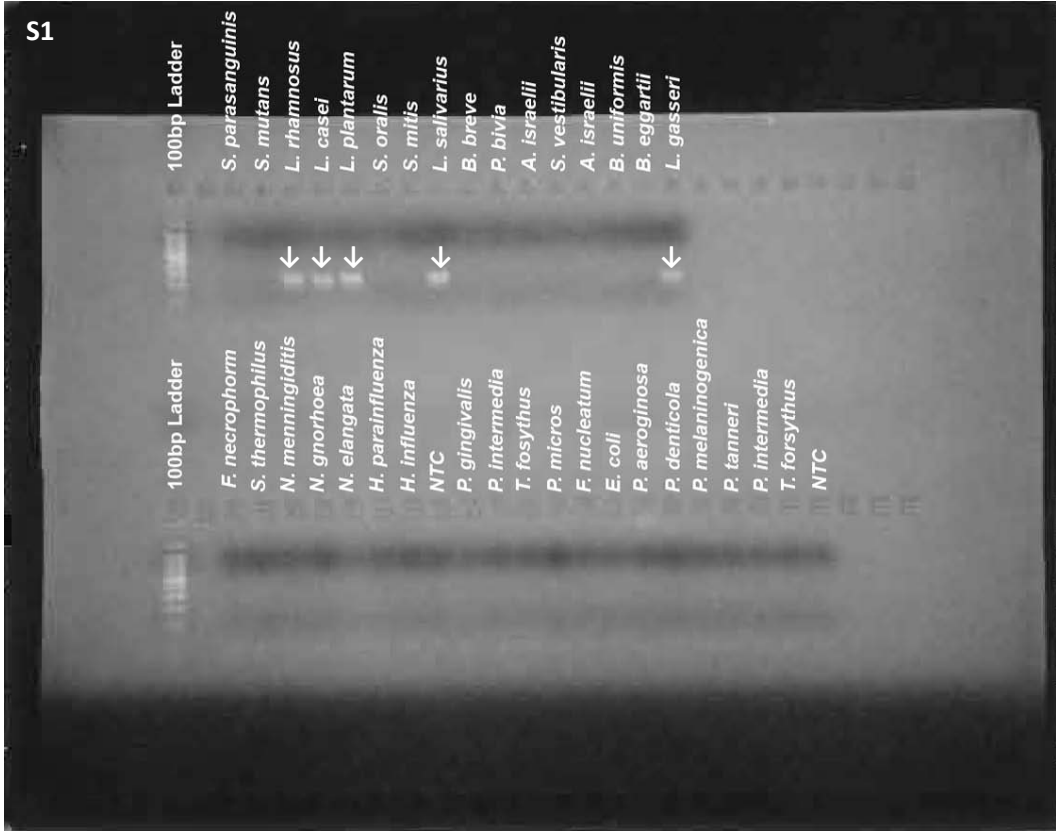

S2

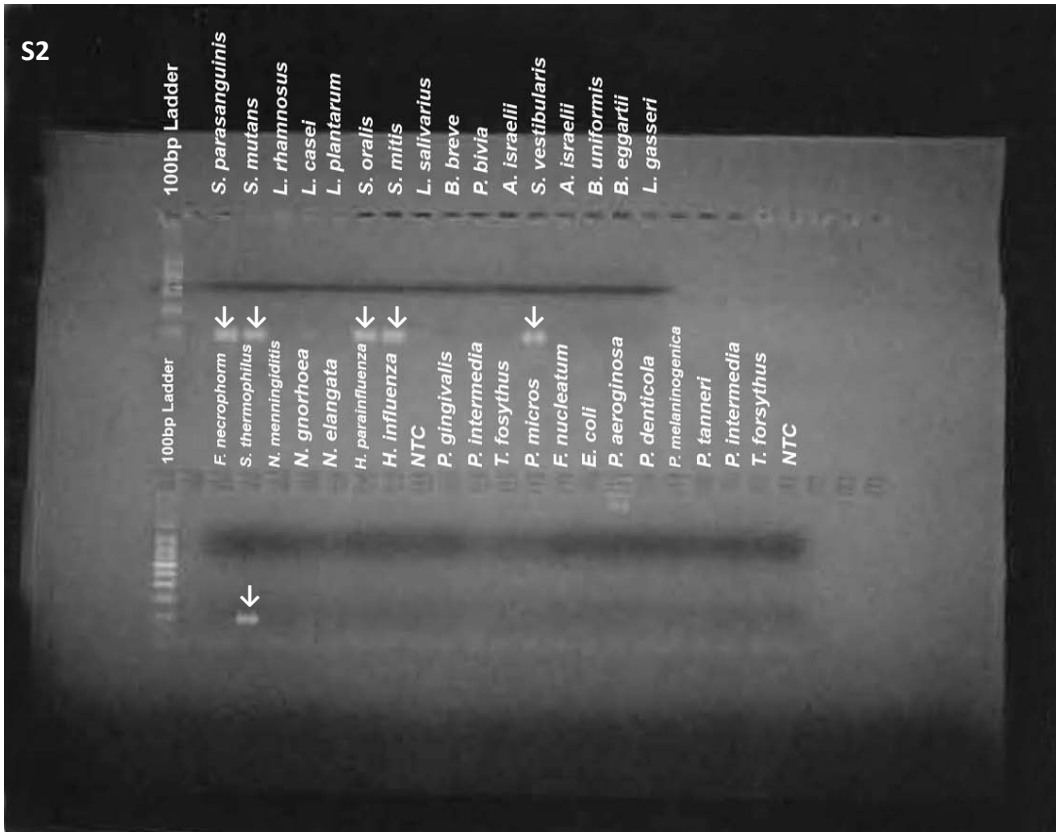

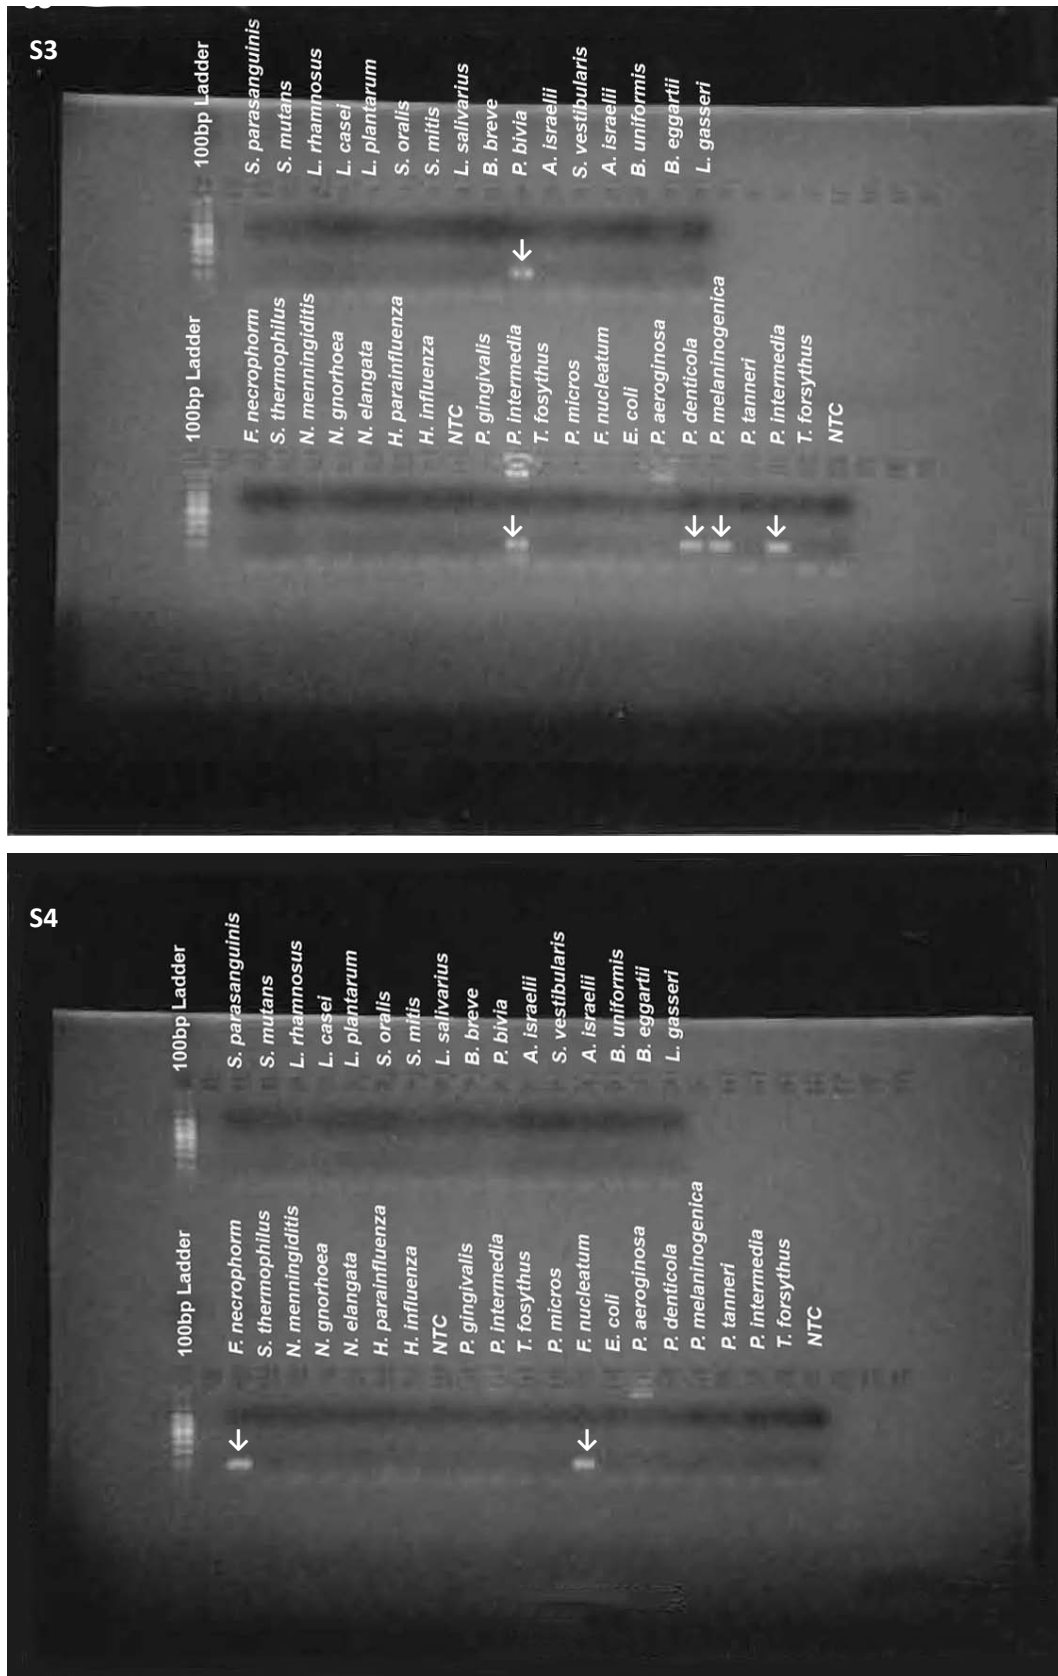

**Figure S.** PCR specificity test results on 2% agarose gel photos. White bands (↓) indicating positive detection of examined DNA. **S1:** Lactobacilli primer set (Amplicon size= 223bp). **S2:** Streptococcal

primer set (Amplicon size= 86bp). **S3**: Prevotellae primer set (Amplicon size= 116bp). **S4**: Fusobacteria primer set (Amplicon size= 87bp).
